# Supplementary material
Source: publisher figshare collection journal article supplement (https://sage.figshare.com/ndownloader/files/19146029)
Supplement: Supplementary file 1 [file 19146029]

## 1 Additional files

### 2 Additional file 1 - Prisma – Checklist<sup>1</sup>

| Section/topic                      | #  | Checklist item                                                                                                                                                                                                                                                                                              | Page #                 |
|------------------------------------|----|-------------------------------------------------------------------------------------------------------------------------------------------------------------------------------------------------------------------------------------------------------------------------------------------------------------|------------------------|
| <b>TITLE</b>                       |    |                                                                                                                                                                                                                                                                                                             |                        |
| Title                              | 1  | Identify the report as a systematic review, meta-analysis, or both.                                                                                                                                                                                                                                         | Title                  |
| <b>ABSTRACT</b>                    |    |                                                                                                                                                                                                                                                                                                             |                        |
| Structured summary                 | 2  | Provide a structured summary including, as applicable: background; objectives; data sources; study eligibility criteria, participants, and interventions; study appraisal and synthesis methods; results; limitations; conclusions and implications of key findings; systematic review registration number. | Abstract               |
| <b>INTRODUCTION</b>                |    |                                                                                                                                                                                                                                                                                                             |                        |
| Rationale                          | 3  | Describe the rationale for the review in the context of what is already known.                                                                                                                                                                                                                              | 1                      |
| Objectives                         | 4  | Provide an explicit statement of questions being addressed with reference to participants, interventions, comparisons, outcomes, and study design (PICOS).                                                                                                                                                  | 1-2                    |
| <b>METHODS</b>                     |    |                                                                                                                                                                                                                                                                                                             |                        |
| Protocol and registration          | 5  | Indicate if a review protocol exists, if and where it can be accessed (e.g., Web address), and, if available, provide registration information including registration number.                                                                                                                               | 2                      |
| Eligibility criteria               | 6  | Specify study characteristics (e.g., PICOS, length of follow-up) and report characteristics (e.g., years considered, language, publication status) used as criteria for eligibility, giving rationale.                                                                                                      | 2/ Additional file 1   |
| Information sources                | 7  | Describe all information sources (e.g., databases with dates of coverage, contact with study authors to identify additional studies) in the search and date last searched.                                                                                                                                  | 2-3                    |
| Search                             | 8  | Present full electronic search strategy for at least one database, including any limits used, such that it could be repeated.                                                                                                                                                                               | 2-3; Additional File 2 |
| Study selection                    | 9  | State the process for selecting studies (i.e., screening, eligibility, included in systematic review, and, if applicable, included in the meta-analysis).                                                                                                                                                   | 3                      |
| Data collection process            | 10 | Describe method of data extraction from reports (e.g., piloted forms, independently, in duplicate) and any processes for obtaining and confirming data from investigators.                                                                                                                                  | 3                      |
| Data items                         | 11 | List and define all variables for which data were sought (e.g., PICOS, funding sources) and any assumptions and simplifications made.                                                                                                                                                                       | 3-4                    |
| Risk of bias in individual studies | 12 | Describe methods used for assessing risk of bias of individual studies (including specification of whether this was done at the study or outcome level), and how this information is to be used in any data synthesis.                                                                                      | 3                      |
| Summary measures                   | 13 | State the principal summary measures (e.g., risk ratio, difference in means).                                                                                                                                                                                                                               | 3-4                    |

|                               |    |                                                                                                                                                                                                          |                      |
|-------------------------------|----|----------------------------------------------------------------------------------------------------------------------------------------------------------------------------------------------------------|----------------------|
| Synthesis of results          | 14 | Describe the methods of handling data and combining results of studies, if done, including measures of consistency (e.g., I <sup>2</sup> ) for each meta-analysis.                                       | 3-4                  |
| Risk of bias across studies   | 15 | Specify any assessment of risk of bias that may affect the cumulative evidence (e.g., publication bias, selective reporting within studies).                                                             | 3                    |
| Additional analyses           | 16 | Describe methods of additional analyses (e.g., sensitivity or subgroup analyses, meta-regression), if done, indicating which were pre-specified.                                                         | N/A                  |
| <b>RESULTS</b>                |    |                                                                                                                                                                                                          |                      |
| Study selection               | 17 | Give numbers of studies screened, assessed for eligibility, and included in the review, with reasons for exclusions at each stage, ideally with a flow diagram.                                          | 4                    |
| Study characteristics         | 18 | For each study, present characteristics for which data were extracted (e.g., study size, PICOS, follow-up period) and provide the citations.                                                             | 4-7                  |
| Risk of bias within studies   | 19 | Present data on risk of bias of each study and, if available, any outcome level assessment (see item 12).                                                                                                | 7/ Additional file 6 |
| Results of individual studies | 20 | For all outcomes considered (benefits or harms), present, for each study: (a) simple summary data for each intervention group (b) effect estimates and confidence intervals, ideally with a forest plot. | 9-12                 |
| Synthesis of results          | 21 | Present results of each meta-analysis done, including confidence intervals and measures of consistency.                                                                                                  | N/A                  |
| Risk of bias across studies   | 22 | Present results of any assessment of risk of bias across studies (see item 15).                                                                                                                          | 7/ Additional file 6 |
| Additional analysis           | 23 | Give results of additional analyses, if done (e.g., sensitivity or subgroup analyses, meta-regression (see item 16)).                                                                                    | N/A                  |
| <b>DISCUSSION</b>             |    |                                                                                                                                                                                                          |                      |
| Summary of evidence           | 24 | Summarize the main findings including the strength of evidence for each main outcome; consider their relevance to key groups (e.g., healthcare providers, users, and policy makers).                     | 12-13                |
| Limitations                   | 25 | Discuss limitations at study and outcome level (e.g., risk of bias), and at review-level (e.g., incomplete retrieval of identified research, reporting bias).                                            | 13-14                |
| Conclusions                   | 26 | Provide a general interpretation of the results in the context of other evidence, and implications for future research.                                                                                  | 14                   |
| <b>FUNDING</b>                |    |                                                                                                                                                                                                          |                      |
| Funding                       | 27 | Describe sources of funding for the systematic review and other support (e.g., supply of data); role of funders for the systematic review.                                                               | 15                   |

## Additional file 2 - PICO- Scheme

|                     | Inclusion criteria                                                                              | Exclusion Criteria                                                                                                              |
|---------------------|-------------------------------------------------------------------------------------------------|---------------------------------------------------------------------------------------------------------------------------------|
| <b>Population</b>   | >50% inpatient or intersectoral primary studies                                                 | inpatient or intersectoral primary studies $\leq 50\%$ ;                                                                        |
| <b>Intervention</b> | planned structure- and/ or process-related intervention                                         | therapy-change without quality-management-relatable background; patient-education; non-interventional background; macro-changes |
| <b>Comparison</b>   | >50% parallel controlled primary studies; comparison with standards-care or other interventions | parallel controlled primary studies $\leq 50\%$ ;                                                                               |
| <b>Outcome</b>      | change of outcome-relevant effects                                                              | no measurement of outcome-relevant results                                                                                      |
| <b>Study type</b>   | systematic reviews or meta-analyses in German or English; Publication-date starting 2000/01/01  | animal studies; published before 2000/01/01; study protocols; other language than English or German                             |

### Additional file 3 - Search strategy per database

| # | Medline: 858 Records                                                                                                                                                     | Embase: 1218 Records                                                                                                                                                          | Cinahl: 247 Records                                                                                                                                                                                                                                                                                                            | PsycInfo: 184 Records                                                                                                                                                                                                                                                                               |
|---|--------------------------------------------------------------------------------------------------------------------------------------------------------------------------|-------------------------------------------------------------------------------------------------------------------------------------------------------------------------------|--------------------------------------------------------------------------------------------------------------------------------------------------------------------------------------------------------------------------------------------------------------------------------------------------------------------------------|-----------------------------------------------------------------------------------------------------------------------------------------------------------------------------------------------------------------------------------------------------------------------------------------------------|
| 1 | Meta-Analysis as Topic/ or meta analy\$.tw . or metaanaly\$.tw . or Meta-Analysis/ or (systematic adj (review\$1 or overview\$1)).tw. or exp Review Literature as Topic/ | (exp Meta Analysis/ or ((meta adj analy\$) or metaanalys\$).ti. or (systematic adj (review\$1 or overview \$1)).ti.)                                                          | Meta analysis/ or TX Meta analys\$ Or TX Metaanaly\$ Or exp Literature review / or TX (systematic adj (review or overview)) NOT PT (Commentary Or Letter Or Editorial) Or Animals/                                                                                                                                             | TX Meta analys\$ Or TX (Metaanaly\$) Or exp (DE "Literature Review " OR DE "Meta Analysis") or TX systematic and (review or overview) NOT (DE "Animals" OR PZ "editorial" or PZ "letter" or PZ "comment/reply")                                                                                     |
| 2 | (cochrane or embase or (psychlit or psyclit) or (psychinfo or psycinfo) or (cinahl or cinhal) or science citation index or bids or cancerlit).ab.                        | (cancerlit.ab. or cochrane.ab. or embase.ab. or (psychlit or psyclit).ab. or (psychinfo or psycinfo).ab. or (cinahl or cinhal).ab. or science citation index.ab. or bids.ab.) | TI (structur* or process*) or AB (structur* or process*)                                                                                                                                                                                                                                                                       | TI (structur* or process*) or AB (structur* or process*) OR DE "Organizational Characteristics" OR DE "Organizational Climate" OR DE "Organizational Structure" OR DE "Organizational Behavior" OR DE "Organizational Commitment" OR DE "Organizational Learning" OR DE "Organizational Objectives" |
| 3 | (reference list\$ or bibliograph\$ or hand-search\$ or relevant journals or manual search\$).ab.                                                                         | (reference list\$.ab. or bibliograph\$.ab. or hand-search\$.ab. or relevant journals.ab. or manual search\$.ab.)                                                              | (MH "Quality of Care Research/AE/EC/ED/ES/EV/OG/ST/TU/UT") OR (MH "Quality of Health Care/UT/ST/MT/MA/EV/ED/EC/AM") OR (MH "Quality Management, Organizational/AM/ED/MA/MT/ST/UT") OR (MH "Quality Assurance/AM/EC/ED/MA/ST/SN") OR TI quality or AB (quality and (healthcare or health-care or health care or patient care or | DE "Quality of Services" OR DE "Quality of Care" or TI quality or AB (quality and (healthcare or health-care or health care or patient care or medical care or treatment or health service*))                                                                                                       |

|   |                                                                        |                                                                   |                                                                                                                                                                                                                                                                                                                      |                                                                                                                                                                                                                                                                                                                                                                                                                                                               |
|---|------------------------------------------------------------------------|-------------------------------------------------------------------|----------------------------------------------------------------------------------------------------------------------------------------------------------------------------------------------------------------------------------------------------------------------------------------------------------------------|---------------------------------------------------------------------------------------------------------------------------------------------------------------------------------------------------------------------------------------------------------------------------------------------------------------------------------------------------------------------------------------------------------------------------------------------------------------|
|   |                                                                        |                                                                   | medical care or treatment or health service*))                                                                                                                                                                                                                                                                       |                                                                                                                                                                                                                                                                                                                                                                                                                                                               |
| 4 | (selection criteria or data extraction).ab. and Review /               | (selection criteria.ab. or data extraction.ab. and Review .pt.)   | TI (improve* or intervent* or implement* or donabedian*) OR AB (improve* or intervent* or implement* or donabedian*) OR (MH "Quality Improve-ment/MT/MA/AMED/EC/ST/UT") OR (MH "Management+") OR (MH "Program Implementation") OR (MH "Systems Implementation") OR (MH "Evaluation and Quality Improvement Program") | TI (improve* or intervent* or implement* or donabedian*) OR AB (improve* or intervent* or implement* or donabedian*) OR DE "Quality of Work Life" OR DE "Organizational Change" OR DE "Downsizing" OR DE "Mergers and Acquisitions") OR (DE "Change Strategies" OR DE "Decentralization" OR DE "Organizational Crises" OR DE "Organizational Development" OR (MH "Program Implementation") OR (MH "Systems Implementation") OR (DE "Organizational Politics") |
| 5 | (comment/ or letter/ or Editorial/ or animal/ not (animal/ and human/) | (letter.pt. or editorial.pt. or animal/ not (animal/ and human/)) | TI outcome or AB (outcome or endpoint*) or (MH "Outcome Assessment") OR (MH "Treatment Outcomes") OR (MH "Nursing Outcomes") OR (MH "Outcomes Research") OR (MH "Outcomes (Health Care)") or (MH "Adverse Health Care Event")                                                                                        | TI outcome or AB (outcome or endpoint*) or (DE "Treatment Outcomes") OR (DE "Side Effects (Treatment)")                                                                                                                                                                                                                                                                                                                                                       |
| 6 | 1 or 2 or 3 or 4                                                       | 1 or 2 or 3 or 4                                                  | TI (indicator* or coherenc* or influenc* or caus* or effect* or correlat* or relat* or cohesio* or associat* or evaluat* or control* or assur*) OR AB (indicator* or coherenc* or influenc* or caus* or effect* or correlat* or relat* or cohesio* or associat* or evaluat* or                                       | TI (indicator* or coherenc* or influenc* or caus* or effect* or correlat* or relat* or cohesio* or associat* or evaluat* or control* or assur*) OR AB (indicator* or coherenc* or influenc* or caus* or effect* or correlat* or relat* or cohesio* or associat* or evaluat* or control* or                                                                                                                                                                    |

|    |                                                                                                                                                                                                                                                                   |                                                                                                                                                                                                                                                                                                                                                                                                                                                                                                                                       |                                                                                                          |                                                                                                                                                                                                                                                                               |
|----|-------------------------------------------------------------------------------------------------------------------------------------------------------------------------------------------------------------------------------------------------------------------|---------------------------------------------------------------------------------------------------------------------------------------------------------------------------------------------------------------------------------------------------------------------------------------------------------------------------------------------------------------------------------------------------------------------------------------------------------------------------------------------------------------------------------------|----------------------------------------------------------------------------------------------------------|-------------------------------------------------------------------------------------------------------------------------------------------------------------------------------------------------------------------------------------------------------------------------------|
|    |                                                                                                                                                                                                                                                                   |                                                                                                                                                                                                                                                                                                                                                                                                                                                                                                                                       | control* or assur*) OR (MH "Clinical Effects") OR (MH "Root Cause Analysis") OR (MH "Variance Analysis") | assur*) OR DE "Statistical Correlation" OR (DE "Multivariate Analysis" OR DE "Statistical Regression" OR DE "Statistical Significance" OR DE "Statistical Variables" OR DE "Personnel Evaluation" OR DE "Program Evaluation" OR DE "Risk Assessment" OR DE "Self-Evaluation") |
| 7  | 6 not 5                                                                                                                                                                                                                                                           | 6 not 5                                                                                                                                                                                                                                                                                                                                                                                                                                                                                                                               | 1 and 2 and 3 and 4 and 5 and 6                                                                          | 1 and 2 and 3 and 4 and 5 and 6                                                                                                                                                                                                                                               |
| 8  | (structur* or process*).ti. or (structur* or process*).ab.                                                                                                                                                                                                        | (structur* or process*).ti. or (structur* or process*).ab.                                                                                                                                                                                                                                                                                                                                                                                                                                                                            | limit 7 to (english or german)                                                                           | limit 7 to (english or german)                                                                                                                                                                                                                                                |
| 9  | (intervent* or implement* or chang* or donabedian* or improve*).ti. or (intervent* or implement* or chang* or donabedian* or improve*).ab. or (organizations/ or exp "organization and administration"/ or or Organizational Innovation/ or Quality Improvement/) | (intervent* or implement* or chang* or donabedian* or improve*).ti. or (intervent* or implement* or chang* or donabedian* or improve*).ab. or (organizational structure/ or nursing process/ or process control/ or clinical indicator/ or health status indicator/ or nursing intervention/ or management/ or hospital management/ or participatory management/ or patient identification/ or exp personnel management/ or exp resource management/ or time management/ or total quality management/ or work schedule/ or workflow/) | limit 8 to yr="2000 -Current"                                                                            | limit 8 to yr="2000 -Current"                                                                                                                                                                                                                                                 |
| 10 | outcome.ti. or (outcome or endpoint*).ab. or "outcome assessment (health care)"/ or                                                                                                                                                                               | treatment outcome/ or adverse outcome/ or outcome assessment/ or outcome.ti. or (out-                                                                                                                                                                                                                                                                                                                                                                                                                                                 |                                                                                                          |                                                                                                                                                                                                                                                                               |

|    |                                                                                                                                                                                                                                                                                                                                                                                 |                                                                                                                                                                                                                                                                                                                                                                                               |  |  |
|----|---------------------------------------------------------------------------------------------------------------------------------------------------------------------------------------------------------------------------------------------------------------------------------------------------------------------------------------------------------------------------------|-----------------------------------------------------------------------------------------------------------------------------------------------------------------------------------------------------------------------------------------------------------------------------------------------------------------------------------------------------------------------------------------------|--|--|
|    | Endpoint Determination/                                                                                                                                                                                                                                                                                                                                                         | come or endpoint*).ab.                                                                                                                                                                                                                                                                                                                                                                        |  |  |
| 11 | (indicator* or coherenc* or influenc* or caus* or effect* or correlat* or relat* or cohesio* or associat* or evaluat* or control* or assur*).ti. or (indicator* or coherenc* or influenc* or caus* or effect* or correlat* or relat* or cohesio* or associat* or evaluat* or control* or assur*).ab. or ("process assessment (health care)"/ or Quality Effects, Health Care/ ) | (indicator* or coherenc* or influenc* or caus* or effect* or correlat* or relat* or cohesio* or associat* or evaluat* or control* or assur*).ti. or (indicator* or coherenc* or influenc* or caus* or effect* or correlat* or relat* or cohesio* or associat* or evaluat* or control* or assur*).ab. or (association/ or quality control procedures/ or process control/ or quality control/) |  |  |
| 12 | "Quality of Health Care"/ or Quality Control/ or Quality Assurance, Health Care/ or quality.ti. or (quality and (healthcare or health-care or health care or patient care or medical care or treatment or health service*)).ab.                                                                                                                                                 | quality.ti. or (quality and (healthcare or health-care or health care or patient care or medical care or treatment or health service*)).ab. or (health care quality/ or "quality of nursing care"/)                                                                                                                                                                                           |  |  |
| 13 | 7 and 8 and 9 and 10 and 11 and 12                                                                                                                                                                                                                                                                                                                                              | 7 and 8 and 9 and 10 and 11 and 12                                                                                                                                                                                                                                                                                                                                                            |  |  |
| 14 | limit 13 to (english or german)                                                                                                                                                                                                                                                                                                                                                 | limit 13 to (english or german)                                                                                                                                                                                                                                                                                                                                                               |  |  |
| 15 | limit 14 to yr="2000 -Current"                                                                                                                                                                                                                                                                                                                                                  | limit 14 to yr="2000 -Current"                                                                                                                                                                                                                                                                                                                                                                |  |  |

## 1 Additional file 4 - Step A: Excluded Papers with reasons

| Reference                                                                                                                                                                                                                                                                                                                                                                                                                                                                   | Reason f. Exclusion        |
|-----------------------------------------------------------------------------------------------------------------------------------------------------------------------------------------------------------------------------------------------------------------------------------------------------------------------------------------------------------------------------------------------------------------------------------------------------------------------------|----------------------------|
| Al-Bahar F, Marriott J, Curtis C, Dhillon H. The effects of computer-aided clinical decision support systems on antibiotic prescribing in secondary care: A systematic review. International Journal of Pharmacy Practice. 2015;23:24.                                                                                                                                                                                                                                      | Conference Abstract        |
| Balogh R, McMorris CA, Lunskey Y, Ouellette-Kuntz H, Bourne L, Colantonio A, et al. Organising healthcare services for persons with an intellectual disability. Cochrane Database of Systematic Reviews. 2016;2016(4):no pagination.                                                                                                                                                                                                                                        | Duplet Copy                |
| Bolton LB, Donaldson NE, Rutledge DN, Bennett C, Brown DS. The impact of nursing interventions: Overview of effective interventions, outcomes, measures, and priorities for future research. Medical Care Research and Review. 2007;64(2, Suppl):123S-43S. doi: 10.1177/1077558707299248. PubMed PMID: 2007-05829-007.                                                                                                                                                      | Publication Type: Overview |
| Brand CA, Barker AL, Morello RT, Vitale MR, Evans SM, Scott IA, et al. A review of hospital characteristics associated with improved performance. International Journal for Quality in Health Care. 2012;24(5):483-94. doi: 10.1093/intqhc/mzs044. PubMed PMID: 2012-25513-007.                                                                                                                                                                                             | Uncontrolled               |
| Campanella P, Lovato E, Marone C, Fallacara L, Mancuso A, Ricciardi W, et al. The impact of electronic health records on healthcare quality: a systematic review and meta-analysis. European journal of public health. 2016;26(1):60-4.                                                                                                                                                                                                                                     | Uncontrolled               |
| Chan R, Webster J. End-of-life care pathways for improving outcomes in caring for the dying. Cochrane Database Syst Rev. 2010;(1):Cd008006. Epub 2010/01/22. doi: 10.1002/14651858.CD008006.pub2. PubMed PMID: 20091660.                                                                                                                                                                                                                                                    | Duplet Copy                |
| Chan RJ, Webster J. End-of-life care pathways for improving outcomes in caring for the dying. The Cochrane database of systematic reviews. 2013;11:CD008006.                                                                                                                                                                                                                                                                                                                | Duplet Copy                |
| Conrad DA, Perry L. Quality-based financial incentives in health care: Can we improve quality by paying for it? Annual Review of Public Health. 2009;30:357-71. doi: 10.1146/annurev.publhealth.031308.100243. PubMed PMID: 2009-04165-012.                                                                                                                                                                                                                                 | Publication Type: Essay    |
| Czoski-Murray C, Lloyd Jones M, McCabe C, Claxton K, Oluboyede Y, Roberts J, et al. What is the value of routinely testing full blood count, electrolytes and urea, and pulmonary function tests before elective surgery in patients with no apparent clinical indication and in subgroups of patients with common comorbidities: a systematic review of the clinical and cost-effective literature. Health technology assessment (Winchester, England). 2012;16(50):i-159. | Uncontrolled               |
| Davey P, Brown E, Fenelon L, Finch R, Gould I, Hartman G, et al. Interventions to improve antibiotic prescribing practices for hospital inpatients. The Cochrane database of systematic reviews. 2005;(4):CD003543.                                                                                                                                                                                                                                                         | Duplet Copy                |
| Fung-Kee-Fung M, Watters J, Crossley C, Goubanova E, Abdulla A, Stern H, et al. Regional collaborations as a tool for quality improvements in surgery: A systematic review of the literature. Annals of Surgery. 2009;249(4):565-72.                                                                                                                                                                                                                                        | System/ macro-changes      |
| Govaert JA, van Bommel ACM, van Dijk WA, van Leersum NJ, Tollenaar RAEM, Wouters MWJM. Reducing healthcare costs facilitated by surgical auditing: a systematic re-                                                                                                                                                                                                                                                                                                         | Uncontrolled               |



|                                                                                                                                                                                                                                                                                                                                                           |                               |
|-----------------------------------------------------------------------------------------------------------------------------------------------------------------------------------------------------------------------------------------------------------------------------------------------------------------------------------------------------------|-------------------------------|
| view . World journal of surgery. 2015;39(7):1672-80.                                                                                                                                                                                                                                                                                                      |                               |
| Hew son-Conroy KM, Elliott D, Burrell AR. Quality and safety in intensive care-A means to an end is critical. Australian critical care : official journal of the Confederation of Australian Critical Care Nurses. 2010;23(3):109-29.                                                                                                                     | Uncontrolled                  |
| Hopkins U, Itty AS, Nazario H, Pinon M, Slyer J, Singleton J. The effectiveness of delegation interventions by the registered nurse to the unlicensed assistive personnel and their impact on quality of care, patient satisfaction, and RN staff satisfaction: A systematic review . JBI Library of Systematic Reviews. 2012;10(15):895-934.             | Study Protocol                |
| Jones AE, Brown MD, Trzeciak S, Shapiro NI, Garrett JS, Heffner AC, et al. The effect of a quantitative resuscitation strategy on mortality in patients with sepsis: a meta-analysis. Critical care medicine. 2008;36(10):2734-9.                                                                                                                         | Therapy<br>Effectiveness      |
| Jones S, Miller C, Lucas J, Gibson J, Leathley M, Price C, et al. The impact of educational interventions for health care professionals on stroke patient care: An integrative review . International Journal of Stroke. 2014;9:21.                                                                                                                       | Conference Abstract           |
| Kavalieratos D, Corbelli J, Ernecoff N, Arnold R, Schenker Y. Identifying the impact of palliative care interventions: A systematic review . Journal of Pain and Symptom Management. 2016;51(2):406.                                                                                                                                                      | Conference Abstract           |
| Laver K, Lannin NA, Bragge P, Hunter P, Holland AE, Tavender E, et al. Organising health care services for people with an acquired brain injury: an overview of systematic reviews and randomised controlled trials. BMC health services research. 2014;14:397.                                                                                           | System/ macro-<br>changes     |
| Lim CKK, Lim AAF, Ainul Nadziha MH, Roslinah A, Sararak S, Chan SK, et al. Boleh balik! Medical Journal of Malaysia. 2010;65:69.                                                                                                                                                                                                                          | Conference Abstract           |
| Long SJ, Brown KF, Ames D, Vincent C. What is known about adverse events in older medical hospital inpatients? A systematic review of the literature. International Journal for Quality in Health Care. 2013;25(5):542-54. doi: 10.1093/intqhc/mzt056. PubMed PMID: 2013-35221-007.                                                                       | No Intervention               |
| Mahar AL, Coburn NG, Karanickolas PJ, Viola R, Helyer LK. Effective palliation and quality of life outcomes in studies of surgery for advanced, non-curative gastric cancer: a systematic review. Gastric cancer : official journal of the International Gastric Cancer Association and the Japanese Gastric Cancer Association. 2012;15 Suppl 1:S138-45. | Uncontrolled                  |
| Mason J, Khunti K, Stone M, Farooqi A, Carr S. Educational Interventions in Kidney Disease Care: A Systematic Review of Randomized Trials. American Journal of Kidney Diseases. 2008;51(6):933-51. doi: <a href="https://doi.org/10.1053/j.ajkd.2008.01.024">https://doi.org/10.1053/j.ajkd.2008.01.024</a> .                                             | Patient Education             |
| McCarthy A, Curtis K, Holland AJA. Paediatric trauma systems and their impact on the health outcomes of severely injured children: An integrative review . Injury. 2016;47(3):574-85.                                                                                                                                                                     | Uncontrolled                  |
| McDonald KM, Matesic B, Contopoulos-Ioannidis DG, Lonhart J, Schmidt E, Pineda N, et al. Patient safety strategies targeted at diagnostic errors: a systematic review. Annals of internal medicine. 2013;158(5 Pt 2):381-9.                                                                                                                               | no Setting provided           |
| McKibbin KA, Lokker C, Handler SM, Dolovich LR, Holbrook AM, O'Reilly D, et al. Enabling medication management through health information technology (Health IT). Evidence report/technology assessment. 2011;(201):1-951.                                                                                                                                | publication Type:<br><br>Book |

|                                                                                                                                                                                                                                                                                                                                                               |                            |
|---------------------------------------------------------------------------------------------------------------------------------------------------------------------------------------------------------------------------------------------------------------------------------------------------------------------------------------------------------------|----------------------------|
| Mercedes A, Fairman P, Hogan L, Thomas R, Slyer JT. Effectiveness of structured multidisciplinary rounding in acute care units on length of stay and satisfaction of patients and staff: A quantitative systematic review. JBI Database of Systematic Reviews and Implementation Reports. 2016;14(7):131-68.                                                  | Study Protocol             |
| Minkman M, Ahaus K, Huijsman R. Performance improvement based on integrated quality management models: what evidence do we have? A systematic literature review. International journal for quality in health care: journal of the International Society for Quality in Health Care. 2007;19(2):90-104.                                                        | Uncontrolled               |
| Murphy EV. Clinical decision support: Effectiveness in improving quality processes and clinical outcomes and factors that may influence success. Yale Journal of Biology and Medicine. 2014;87(2):187-97.                                                                                                                                                     | publication type:<br>Essay |
| Nagarajan A, Ramsaroop S, Siegler E, Reid C. Interventions designed to improve transitional care of patients discharged from hospital to home: A systematic review. Journal of the American Geriatrics Society. 2010;58:S224.                                                                                                                                 | Conference Abstract        |
| Olson DM, Bettger JP, Alexander KP, Kendrick AS, Irvine JR, Wing L, et al. Transition of care for acute stroke and myocardial infarction patients: from hospitalization to rehabilitation, recovery, and secondary prevention. Evidence report/technology assessment. 2011;(202):1-197.                                                                       | Conference Abstract        |
| Ong M-S, Coiera E. A systematic review of failures in handoff communication during intrahospital transfers. Joint Commission journal on quality and patient safety. 2011;37(6):274-84.                                                                                                                                                                        | No Intervention            |
| Ottevanger PB, De Mulder PHM. The quality of chemotherapy and its quality assurance. European journal of surgical oncology: the journal of the European Society of Surgical Oncology and the British Association of Surgical Oncology. 2005;31(6):656-66.                                                                                                     | No Intervention            |
| Papanikolaou PN, Christidi GD, Ioannidis JPA. Patient Outcomes with Teaching Versus Nonteaching Healthcare: A Systematic Review. PLOS Medicine. 2006;3(9):e341. doi: 10.1371/journal.pmed.0030341.                                                                                                                                                            | No intervention            |
| Parand A, Dopson S, Renz A, Vincent C. The role of hospital managers in quality and patient safety: A systematic review. BMJ Open. 2014;4:no pagination.                                                                                                                                                                                                      | Uncontrolled               |
| Patterson M, Rick J, Wood S, Carroll C, Balain S, Booth A. Systematic review of the links between human resource management practices and performance. Health technology assessment (Winchester, England). 2010;14(51):1-iv.                                                                                                                                  | Publication Type:<br>Book  |
| Ploeg AJ, Flu HC, Lardenoye JHP, Hamming JF, Breslau PJ. Assessing the quality of surgical care in vascular surgery; moving from outcome towards structural and process measures. European journal of vascular and endovascular surgery: the official journal of the European Society for Vascular Surgery. 2010;40(6):696-707.                               | No Intervention            |
| Ramsay C, Pickard R, Robertson C, Close A, Vale L, Armstrong N, et al. Systematic review and economic modelling of the relative clinical benefit and cost-effectiveness of laparoscopic surgery and robotic surgery for removal of the prostate in men with localised prostate cancer. Health technology assessment (Winchester, England). 2012;16(41):1-313. | Therapy<br>Effectiveness   |
| Rawal N. Fast-track postoperative protocols-how effective are they? Regional Anesthesia and Pain Medicine. 2012;37(5 SUPPL. 1):E134-E5.                                                                                                                                                                                                                       | Conference Abstract        |
| Reeves S, Zwarenstein M, Goldman J, Barr H, Freeth D, Hammick M, et al. Interprofessional education: effects on professional practice and health care outcomes. The                                                                                                                                                                                           | Duplet copy                |

|                                                                                                                                                                                                                                                                                                   |                                |
|---------------------------------------------------------------------------------------------------------------------------------------------------------------------------------------------------------------------------------------------------------------------------------------------------|--------------------------------|
| Cochrane database of systematic reviews. 2008;(1):CD002213.                                                                                                                                                                                                                                       |                                |
| Ruetters D, Keinki C, Schroth S, Liebl P, Huebner J. Is there evidence for a better health care for cancer patients after a second opinion? A systematic review . Journal of Cancer Research and Clinical Oncology. 2016;142(7):1521-8.                                                           | Uncontrolled                   |
| Scarpinata R, Aly EH. Does robotic rectal cancer surgery offer improved early postoperative outcomes? Diseases of the colon and rectum. 2013;56(2):253-62.                                                                                                                                        | Therapy<br>Effectiveness       |
| Seehusen DA. Clinical pathways: Effects on practice, outcomes, and costs. American Family Physician. 2010;82(11):1338-9.                                                                                                                                                                          | Duplet copy                    |
| Sheehan J, Sherman KA. Computerised decision aids: a systematic review of their effectiveness in facilitating high-quality decision-making in various health-related contexts. Patient education and counseling. 2012;88(1):69-86.                                                                | no Setting provided            |
| Shepperd S, Parkes J, McClaren J, Phillips C. Discharge planning from hospital to home. Cochrane Database Syst Rev. 2004;(1):CD000313. Epub 2004/02/20. doi: 10.1002/14651858.CD000313.pub2. PubMed PMID: 14973952.                                                                               | Duplet copy                    |
| Spinewine A, Claeys C, Foulon V, Chevalier P. Approaches for improving continuity of care in medication management: a systematic review . International journal for quality in health care : journal of the International Society for Quality in Health Care / ISQua. 2013;25(4):403-17.          | No Outcome-<br>Dimension       |
| Tan SB, Williams AF, Kelly D. Effectiveness of multidisciplinary interventions to improve the quality of life for people with Parkinson's disease: a systematic review . International journal of nursing studies. 2014;51(1):166-74.                                                             | Patient Education              |
| Thomas L, Cullum N, McColl E, Rousseau N, Soutter J, Steen N. Guidelines in professions allied to medicine. The Cochrane database of systematic reviews. 1999;(2):CD000349.                                                                                                                       | Published before<br>01/01/2000 |
| Thomson O'Brien MA, Oxman AD, Davis DA, Haynes RB, Freemantle N, Harvey EL. Audit and feedback: effects on professional practice and health care outcomes. The Cochrane database of systematic reviews. 2000;(2):CD000259.                                                                        | Duplet copy                    |
| Vloothuis JDM, Mulder M, Veerbeek JM, Konijnenbelt M, Visser-Meily JM, Ket JC, et al. Caregiver-mediated exercises for improving outcomes after stroke. Cochrane Database of Systematic Reviews. 2016;2016(12):no pagination.                                                                     | no Setting provided            |
| Vuokko R, Makela-Bengs P, Hypponen H, Lindqvist M, Doupi P. Impacts of structuring the electronic health record: Results of a systematic literature review from the perspective of secondary use of patient data. International Journal of Medical Informatics. 2017;97:293-303.                  | Uncontrolled                   |
| Walczak A, Butow PN, Bu S, Clayton JM. A systematic review of evidence for end-of-life communication interventions: Who do they target, how are they structured and do they work? Patient Education and Counseling. 2016;99(1):3-16. doi: 10.1016/j.pec.2015.08.017. PubMed PMID: 2015-44106-001. | no Setting provided            |
| White HL, Glazier RH. Do hospitalist physicians improve the quality of inpatient care delivery? A systematic review of process, efficiency and outcome measures. BMC medicine. 2011;9:58.                                                                                                         | No Intervention                |

|                                                                                                                                                                                                                                                                                                                        |                       |
|------------------------------------------------------------------------------------------------------------------------------------------------------------------------------------------------------------------------------------------------------------------------------------------------------------------------|-----------------------|
| Wong BM, Etchells EE, Kuper A, Levinson W, Shojania KG. Teaching quality improvement and patient safety to trainees: A systematic review . Academic Medicine. 2010;85(9):1425-39. doi: 10.1097/ACM.0b013e3181e2d0c6. PubMed PMID: 2010-19253-005.                                                                      | No Outcome-Dimension  |
| Young AS, Chaney E, Shoai R, Bonner L, Cohen AN, Doebbeling B, et al. Information technology to support improved care for chronic illness. Journal of General Internal Medicine. 2007;22(Suppl 3):425-30. doi: 10.1007/s11606-007-0303-4. PubMed PMID: 2010-08102-007.                                                 | No Outcome-Dimension  |
| Young MP, Birkmeyer JD. Potential reduction in mortality rates using an intensivist model to manage intensive care units. Effective clinical practice : ECP. 2000;3(6):284-9.                                                                                                                                          | Uncontrolled          |
| Zaidi AKM, Ganatra HA, Syed S, Cousens S, Lee ACC, Black R, et al. Effect of case management on neonatal mortality due to sepsis and pneumonia. Neonatal Intensive Care. 2011;24(7):55-8. PubMed PMID: 108211371. Language: English. Entry Date: 20120217. Revision Date: 20150712. Publication Type: Journal Article. | Therapy Effectiveness |
| Zw arenstein M, Bryant W. Interventions to promote collaboration betw een nurses and doctors. The Cochrane database of systematic reviews. 2000;(2):CD000072.                                                                                                                                                          | Duplet Copy           |

2

3

#### 4 Additional file 5 - Step B: Excluded Papers with reasons and characteristics

| Reference                                                                                                                                                                                                                                                                                                                                       | Intervention                                                     | Interven-<br>tion-Di-<br>mension | Included Primary Studies |            |       |            |       | Reason<br><br>for exclu-<br>sion | Direction    |
|-------------------------------------------------------------------------------------------------------------------------------------------------------------------------------------------------------------------------------------------------------------------------------------------------------------------------------------------------|------------------------------------------------------------------|----------------------------------|--------------------------|------------|-------|------------|-------|----------------------------------|--------------|
|                                                                                                                                                                                                                                                                                                                                                 |                                                                  |                                  | $\Sigma$                 | Outpatient |       | Controlled |       |                                  |              |
|                                                                                                                                                                                                                                                                                                                                                 |                                                                  |                                  |                          | n          | %     | n          | %     |                                  |              |
| Ali MK, Shah S, Tandon N. Review of electronic decision-support tools for diabetes care: a viable option for low - and middle-income countries? Journal of diabetes science and technology. 2011;5(3):553-70.                                                                                                                                   | Electronic Decision-Support Tools                                | structure                        | 26                       | 23         | 88,0  | 20         | 77,0  | Setting                          | intervention |
| Alkhenizan A, Shaw C. Impact of accreditation on the quality of healthcare services: A systematic review of the literature. Annals of Saudi Medicine. 2011;31(4):407-16.                                                                                                                                                                        | Accreditation                                                    | both                             | 26                       | 0          | 0,0   | 1          | 3,8   | Study Type                       | intervention |
| Allard P, Maunsell E, Labbe J, Dorval M. Educational interventions to improve cancer pain control: a systematic review . Journal of palliative medicine. 2001;4(2):191-203.                                                                                                                                                                     | pain control                                                     | process                          | 33                       | 22         | 66,0  | 6          | 18,1  | Study Type + Setting             | intervention |
| Arditi C, Rege-Walther M, Wyatt JC, Durieux P, Burnand B. Computer-generated reminders delivered on paper to healthcare professionals; effects on professional practice and health care outcomes. The Cochrane database of systematic reviews. 2012;12:CD001175.                                                                                | Computer-generated reminders                                     | structure                        | 37                       | 26         | 70,3  | 37         | 100,0 | Setting                          | intervention |
| Baig AA, Wilkes AE, Davis AM, Peek ME, Huang ES, Bell DS, et al. The use of quality improvement and health information technology approaches to improve diabetes outcomes in African American and Hispanic patients. Medical Care Research and Review . 2010;67(5, Suppl):163S-97S. doi: 10.1177/1077558710374621. PubMed PMID: 2010-19337-002. | Quality Improvement and Health Information Technology Approaches | both                             | 18                       | 0          | 0,0   | 6          | 33,0  | Study Type                       | intervention |
| Balogh R, McMorris CA, Lunskey Y, Ouellette-Kuntz H, Bourne L, Colantonio A, et al. Organising healthcare services for persons with an intellectual disability. Cochrane Database of Systematic Review s. 2016;2016(4):no pagination.                                                                                                           | organizational interven-<br>tions                                | both                             | 7                        | 5          | 71,4  | 7          | 100,0 | Setting                          | Unclear      |
| Banning M. A review of interventions used to improve adherence to medication in older people. International Journal of Nursing Studies. 2009;46(11):1505-15. doi:                                                                                                                                                                               | interventions used to<br>improve adherence to                    | both                             | 21                       | 21         | 100,0 | 2          | 9,5   | Study Type +                     | Unclear      |

|                                                                                                                                                                                                                                                                                                                      |                                                                                                                            |           |    |   |      |    |      |            |               |
|----------------------------------------------------------------------------------------------------------------------------------------------------------------------------------------------------------------------------------------------------------------------------------------------------------------------|----------------------------------------------------------------------------------------------------------------------------|-----------|----|---|------|----|------|------------|---------------|
| 10.1016/j.ijnurstu.2009.03.011. PubMed PMID: 2009-16610-006.                                                                                                                                                                                                                                                         | medication                                                                                                                 |           |    |   |      |    |      | Setting    |               |
| Bos JM, van den Bernt PM, de Smet PA, Kramers C. The effect of prescriber education on medication-related patient harm in the hospital: A systematic review . British Journal of Clinical Pharmacology. 2017:no pagination.                                                                                          | prescriber education                                                                                                       | structure | 15 | 0 | 0,0  | 3  | 20,0 | Study Type | standard-care |
| Brink-Huis A, van Achterberg T, Schoonhoven L. Pain management: a review of organisation models with integrated processes for the management of pain in adult cancer patients. Journal of clinical nursing. 2008;17(15):1986-2000.                                                                                   | Pain management                                                                                                            | process   | 12 | 5 | 41,6 | 1  | 8,0  | Study Type | intervention  |
| Conry MC, Humphries N, Morgan K, McGowan Y, Montgomery A, Vedhara K, et al. A 10 year (2000-2010) systematic review of interventions to improve quality of care in hospitals. BMC health services research. 2012;12:275.                                                                                             | interventions to improve quality of care                                                                                   | both      | 20 | 0 | 0,0  | 1  | 5,0  | Study Type | Unclear       |
| Cortois PJ, Simoons S, Peetermans W, Willems L, Laekeman G. Implementing a hospital guideline on pneumonia: A semi-quantitative review . International Journal for Quality in Health Care. 2007;19(6):358-67.                                                                                                        | hospital guideline                                                                                                         | process   | 27 | 0 | 0,0  | 0  | 1,0  | Study Type | intervention  |
| Davey P, Brown E, Charani E, Fenelon L, Gould IM, Holmes A, et al. Interventions to improve antibiotic prescribing practices for hospital inpatients. The Cochrane database of systematic reviews . 2013;4:CD003543.                                                                                                 | improve antibiotic prescribing practices                                                                                   | both      | 89 | 0 | 0,0  | 36 | 41,0 | Study Type | intervention  |
| Field RA, Fritz Z, Baker A, Grove A, Perkins GD. Systematic review of interventions to improve appropriate use and outcomes associated with do-not-attempt-cardiopulmonary-resuscitation decisions. Resuscitation. 2014;85(11):1418-31.                                                                              | interventions to improve appropriate use + outcomes associated with do-not-attempt-cardiopulmonary resuscitation decisions | both      | 37 | 0 | 0,0  | 11 | 29,0 | Study Type | Unclear       |
| Flynn D, Knoedler MA, Hess EP, Murad MH, Erwin PJ, Montori VM, et al. Engaging patients in health care decisions in the emergency department through shared decision-making: a systematic review . Academic emergency medicine : official journal of the Society for Academic Emergency Medicine. 2012;19(8):959-67. | approaches, methods, and tools used to engage patients/surrogates in SDM in the                                            | both      | 5  | 0 | 0,0  | 2  | 40,0 | Study Type | intervention  |

|                                                                                                                                                                                                                                                                                                                                                                                                                               |                                                                                                            |           |     |    |      |     |       |                      |               |
|-------------------------------------------------------------------------------------------------------------------------------------------------------------------------------------------------------------------------------------------------------------------------------------------------------------------------------------------------------------------------------------------------------------------------------|------------------------------------------------------------------------------------------------------------|-----------|-----|----|------|-----|-------|----------------------|---------------|
|                                                                                                                                                                                                                                                                                                                                                                                                                               | Emergency Department                                                                                       |           |     |    |      |     |       |                      |               |
| Hall J, Peat M, Birks Y, Golder S, Entwistle V, Gilbody S, et al. Effectiveness of interventions designed to promote patient involvement to enhance safety: a systematic review. Quality & Safety in Health Care. 2010;19(5):e10-e. doi: 10.1136/qshc.2009.032748. PubMed PMID: 105014221. Corporate Author: PIPS Group. Language: English. Entry Date: 20101210. Revision Date: 20150711. Publication Type: Journal Article. | interventions used for the explicit intention of promoting patients/ family ...) involvement in their care | both      | 15  | 9  | 60,0 | 14  | 93,0  | Setting              | Unclear       |
| Harding KE, Taylor NF, Leggat SG. Do triage systems in healthcare improve patient flow? A systematic review of the literature. Australian Health Review . 2011;35(3):371-83.                                                                                                                                                                                                                                                  | triage/ prioritisation                                                                                     | process   | 25  | 0  | 0,0  | 6   | 24,0  | Study Type           | intervention  |
| Hempel S, Newberry S, Wang Z, Booth M, Shanman R, Johnsen B, et al. Hospital fall prevention: a systematic review of implementation, components, adherence, and effectiveness. Journal of the American Geriatrics Society. 2013;61(4):483-94.                                                                                                                                                                                 | fall prevention interventions                                                                              | process   | 59  | 0  | 0,0  | 11  | 18,0  | Study Type           | Unclear       |
| Higginson IJ, Finlay I, Goodwin DM, Cook AM, Hood K, Edwards AGK, et al. Do hospital-based palliative teams improve care for patients or families at the end of life? Journal of pain and symptom management. 2002;23(2):96-106.                                                                                                                                                                                              | Hospital-Based Palliative Teams                                                                            | both      | 13  | 0  | 0,0  | 2   | 13,0  | Study Type           | intervention  |
| Howell A-M, Panesar SS, Burns EM, Donaldson LJ, Darzi A. Reducing the burden of surgical harm: a systematic review of the interventions used to reduce adverse events in surgery. Annals of surgery. 2014;259(4):630-41.                                                                                                                                                                                                      | Interventions Used to Reduce Adverse Events                                                                | both      | 92  | 0  | 0,0  | 9   | 10,0  | Study Type           | standard-care |
| Ivers N, Jamtvedt G, Flottorp S, Young JM, Odgaard-Jensen J, French SD, et al. Audit and feedback: effects on professional practice and healthcare outcomes. Cochrane Database of Systematic Reviews. 2012;(6). doi: 10.1002/14651858.CD000259.pub3. PubMed PMID: CD000259.                                                                                                                                                   | Audit and feedback                                                                                         | process   | 140 | 94 | 67,0 | 140 | 100,0 | Setting              | intervention  |
| Jamal A, McKenzie K, Clark M. The impact of health information technology on the quality of medical and health care: a systematic review. The HIM journal. 2009;38(3):26-37.                                                                                                                                                                                                                                                  | health information technology                                                                              | structure | 23  | 18 | 78,0 | 8   | 35,0  | Study Type + Setting | intervention  |
| Kotronoulas G, Kearney N, Maguire R, Harrow A, DiDomenico D, Croy S, et al. What is the value of the routine use of patient-reported outcome measures toward improvement of                                                                                                                                                                                                                                                   | Routine Use of Patient-Reported Outcome                                                                    | structure | 26  | 22 | 84,0 | 26  | 100,0 | Setting              | intervention  |

|                                                                                                                                                                                                                                                                                                                                                          |                                                    |           |    |    |       |    |       |            |               |
|----------------------------------------------------------------------------------------------------------------------------------------------------------------------------------------------------------------------------------------------------------------------------------------------------------------------------------------------------------|----------------------------------------------------|-----------|----|----|-------|----|-------|------------|---------------|
| patient outcomes, processes of care, and health service outcomes in cancer care? A systematic review of controlled trials. Journal of clinical oncology : official journal of the American Society of Clinical Oncology. 2014;32(14):1480-501.                                                                                                           | Measures                                           |           |    |    |       |    |       |            |               |
| Kw an J, Sandercock P. In-hospital care pathw ays for stroke. The Cochrane database of systematic reviews. 2002;(2):CD002924.                                                                                                                                                                                                                            | care pathw ays                                     | process   | 15 | 0  | 0,0   | 5  | 33,0  | Study Type | Unclear       |
| Le Grand Rogers R, Narvaez Y, Venkatesh AK, Fleischman W, Hall MK, Taylor RA, et al. Improving emergency physician performance using audit and feedback: a systematic review . The American journal of emergency medicine. 2015;33(10):1505-14.                                                                                                          | audit and feedback                                 | both      | 24 | 0  | 0,0   | 1  | 4,0   | Study Type | intervention  |
| Legare F, Turcotte S, Stacey D, Ratte S, Kryworuchko J, Graham ID. Patients' perceptions of sharing in decisions: a systematic review of interventions to enhance shared decision making in routine clinical practice. The patient. 2012;5(1):1-19.                                                                                                      | shared decision making                             | process   | 21 | 18 | 86,0  | 21 | 100,0 | Setting    | intervention  |
| Lugtenberg M, Burgers JS, Westert GP. Effects of evidence-based clinical practice guide-lines on quality of care: a systematic review . Quality & Safety in Health Care. 2009;18(5):385-92. doi: 10.1136/qshc.2008.028043. PubMed PMID: 105235856. Lan-guage: English. Entry Date: 20100101. Revision Date: 20150711. Publication Type: Journal Article. | evidence-based clinical practice guidelines        | process   | 20 | 20 | 100,0 | 14 | 70,0  | Setting    | intervention  |
| Marshall S, Hayw ood K, Fitzpatrick R. Impact of patient-reported outcome measures on routine practice: A structured review . Journal of Evaluation in Clinical Practice. 2006;12(5):559-68. doi: 10.1111/j.1365-2753.2006.00650.x. PubMed PMID: 2006-12561-008.                                                                                         | clinical use of patient-reported outcome measures  | structure | 38 | 38 | 100,0 | 35 | 92,0  | Setting    | Unclear       |
| Moraros J, Lemstra M, Nw ankwo C. Lean interventions in healthcare: Do they actually w ork? A systematic literature review . International Journal for Quality in Health Care. 2016;28(2):150-65.                                                                                                                                                        | lean management                                    | process   | 22 | 5  | 23,0  | 1  | 5,0   | Study Type | standard-care |
| Mueller SK, Sponsler K, Kripalani S, Schnipper JL. Hospital-based medication reconcilia-tion practices: A systematic review . Archives of Internal Medicine. 2012;172(14):1057-69. doi: 10.1001/archinternmed.2012.2246.                                                                                                                                 | Interprofessional:<br>Medication<br>Reconciliation | both      | 26 | 0  | 0,0   | 13 | 50,0  | Study Type | intervention  |



|                                                                                                                                                                                                                                                                                                                                                                |                                                                                |           |    |    |      |    |       |                      |               |
|----------------------------------------------------------------------------------------------------------------------------------------------------------------------------------------------------------------------------------------------------------------------------------------------------------------------------------------------------------------|--------------------------------------------------------------------------------|-----------|----|----|------|----|-------|----------------------|---------------|
| Oluoch T, Santas X, Kw aro D, Were M, Biondich P, Bailey C, et al. The effect of electronic medical record-based clinical decision support on HIV care in resource-constrained settings: a systematic review . International journal of medical informatics. 2012;81(10):e83-92.                                                                               | medical record-based clinical decision support                                 | structure | 12 | 7  | 58,0 | 1  | 8,0   | Study Type + Setting | Unclear       |
| Ospina MB, Taenzer P, Rashid S, MacDermid JC, Carr E, Chojecki D, et al. A systematic review of the effectiveness of knowledge translation interventions for chronic noncancer pain management. Pain research & management : the journal of the Canadian Pain Society = journal de la societe canadienne pour le traitement de la douleur. 2013;18(6):e129-41. | Knowledge translation interventions                                            | both      | 19 | 18 | 95,0 | 19 | 100,0 | Setting              | intervention  |
| Patow CA, Karpovich K, Riesenber LA, Jaeger J, Rosenfeld JC, Wittenbreer M, et al. Residents' engagement in quality improvement: a systematic review of the literature. Academic medicine : journal of the Association of American Medical Colleges. 2009;84(12):1757-64.                                                                                      | residents' participation in QI initiatives                                     | process   | 28 | 3  | 11,0 | 1  | 3,5   | Study Type           | Unclear       |
| Reeves S, Perrier L, Goldman J, Freeth D, Zw arenstein M. Interprofessional education: effects on professional practice and healthcare outcomes (update). The Cochrane database of systematic reviews. 2013;3:CD002213.                                                                                                                                        | Interprofessional education                                                    | structure | 15 | 8  | 53,0 | 13 | 86,0  | Setting              | Unclear       |
| Robertson ER, Morgan L, Bird S, Catchpole K, McCulloch P. Interventions employed to improve intrahospital handover: a systematic review. BMJ quality & safety. 2014;23(7):600-7.                                                                                                                                                                               | mono-/ multicomponent Interventions employed to improve intrahospital handover | process   | 29 | 0  | 0,0  | 3  | 10,0  | Study Type           | standard-care |
| Salgado TM, Moles R, Benrimoj SI, Fernandez-Llimos F. Pharmacists' interventions in the management of patients with chronic kidney disease: A systematic review. Nephrology Dialysis Transplantation. 2012;27(1):276-92.                                                                                                                                       | Pharmacists' interventions                                                     | process   | 37 | 11 | 29,7 | 8  | 22,0  | Study Type           | intervention  |
| Schouten LMT, Hulscher MEJL, van Everdingen JJE, Huijsman R, Grol RPTM. Evidence for the impact of quality improvement collaboratives: systematic review. BMJ (Clinical research ed). 2008;336(7659):1491-4.                                                                                                                                                   | quality improvement collaboratives                                             | both      | 72 | 6  | 8,3  | 12 | 17,0  | Study Type           | intervention  |
| Soban LM, Hempel S, Munjas BA, Miles J, Rubenstein LV. Preventing pressure ulcers in                                                                                                                                                                                                                                                                           | Nurse-Focused Quality                                                          | process   | 39 | 0  | 0,0  | 3  | 8,0   | Study                | Unclear       |

|                                                                                                                                                                                                                                                                           |                                                      |           |    |    |      |    |      |                      |               |
|---------------------------------------------------------------------------------------------------------------------------------------------------------------------------------------------------------------------------------------------------------------------------|------------------------------------------------------|-----------|----|----|------|----|------|----------------------|---------------|
| hospitals: A systematic review of nurse-focused quality improvement interventions. Joint Commission journal on quality and patient safety. 2011;37(6):245-52.                                                                                                             | Improvement Interventions                            |           |    |    |      |    |      | Type                 |               |
| Tho PC, Ang E. The effectiveness of patient navigation programs for adult cancer patients undergoing treatment: A systematic review . JBI Database of Systematic Reviews and Implementation Reports. 2016;14(2):295-321.                                                  | nurse-led patient navigation programs                | process   | 4  | 0  | 0,0  | 2  | 50,0 | Study Type           | standard-care |
| Tjia J, Velten SJ, Parsons C, Valluri S, Briesacher BA. Studies to reduce unnecessary medication use in frail older adults: A systematic review . Drugs and Aging. 2013;30(5):285-307.                                                                                    | Drug Review and Discontinuation Processes            | process   | 39 | 23 | 58,0 | 21 | 53,0 | Setting              | Unclear       |
| van der Veer SN, de Keizer NF, Ravelli ACJ, Tenkink S, Jager KJ. Improving quality of care. A systematic review on how medical registries provide information feedback to health care providers. International journal of medical informatics. 2010;79(5):305-23.         | information feedback to health care providers        | process   | 53 | 31 | 58,4 | 15 | 28,0 | Study Type           | intervention  |
| Van Herck P, Vanhaecht K, Deneckere S, Bellemans J, Panella M, Barbieri A, et al. Key interventions and outcomes in joint arthroplasty clinical pathways: A systematic review . Journal of Evaluation in Clinical Practice. 2010;16(1):39-49.                             | Key interventions and outcomes in joint arthroplasty | process   | 34 | 0  | 0,0  | 3  | 9,0  | Study Type           | Unclear       |
| van Rosse F, Maat B, Rademaker CMA, van Vught AJ, Egberts ACG, Bollen CW. The effect of computerized physician order entry on medication prescription errors and clinical outcome in pediatric and intensive care: a systematic review . Pediatrics. 2009;123(4):1184-90. | Physician Order Entry                                | process   | 12 | 0  | 0,0  | 0  | 0,0  | Study Type           | intervention  |
| Weinmann S, Koesters M, Becker T. Effects of implementation of psychiatric guidelines on provider performance and patient outcome: Systematic review . Acta Psychiatrica Scandinavica. 2007;115(6):420-33.                                                                | psychiatric guidelines                               | process   | 18 | 12 | 66,7 | 15 | 83,0 | Setting              | Unclear       |
| Yourman L, Concato J, Agostini JV. Use of computer decision support interventions to improve medication prescribing in older adults: a systematic review . The American journal of geriatric pharmacotherapy. 2008;6(2):119-29.                                           | computer decision support interventions              | structure | 10 | 7  | 70,0 | 5  | 50,0 | Study Type + Setting | Unclear       |

## 5 Additional file 6 - R - Amstar- Score for every systematic review

| Ref.             |  | Max. Score | Score | R-Amstar-Item (max. 4 Score-points per item) |   |   |   |   |   |   |   |   |    |    |
|------------------|--|------------|-------|----------------------------------------------|---|---|---|---|---|---|---|---|----|----|
|                  |  |            |       | 1                                            | 2 | 3 | 4 | 5 | 6 | 7 | 8 | 9 | 10 | 11 |
| No Meta-Analysis |  |            |       |                                              |   |   |   |   |   |   |   |   |    |    |
| 42               |  | 41         | 36    | 4                                            | 4 | 4 | 4 | 4 | 4 | 4 | 3 | 1 | 1  | 3  |
| 39               |  | 41         | 30    | 3                                            | 4 | 3 | 2 | 1 | 4 | 4 | 4 | 1 | 1  | 3  |
| 19               |  | 41         | 25    | 3                                            | 4 | 3 | 2 | 1 | 4 | 1 | 4 | 1 | 1  | 1  |
| 27               |  | 41         | 24    | 3                                            | 2 | 4 | 1 | 2 | 4 | 1 | 2 | 1 | 1  | 3  |
| 21               |  | 41         | 29    | 3                                            | 4 | 3 | 2 | 4 | 4 | 1 | 3 | 1 | 1  | 3  |
| 31               |  | 41         | 32    | 3                                            | 4 | 4 | 3 | 4 | 4 | 4 | 2 | 1 | 1  | 2  |
| 52               |  | 41         | 34    | 4                                            | 4 | 4 | 2 | 4 | 4 | 3 | 4 | 1 | 1  | 3  |
| 28               |  | 41         | 25    | 3                                            | 4 | 3 | 2 | 1 | 1 | 3 | 3 | 1 | 1  | 3  |
| 49               |  | 41         | 30    | 3                                            | 2 | 4 | 2 | 2 | 4 | 4 | 4 | 1 | 1  | 3  |
| 44               |  | 41         | 31    | 3                                            | 4 | 4 | 4 | 2 | 4 | 4 | 2 | 1 | 1  | 2  |
| 50               |  | 41         | 19    | 2                                            | 1 | 4 | 2 | 1 | 4 | 1 | 1 | 1 | 1  | 1  |
| 46               |  | 41         | 38    | 4                                            | 4 | 4 | 4 | 4 | 4 | 4 | 4 | 1 | 2  | 3  |
| 29               |  | 41         | 28    | 3                                            | 2 | 4 | 1 | 2 | 4 | 4 | 3 | 1 | 1  | 3  |
| 51               |  | 41         | 36    | 4                                            | 4 | 4 | 3 | 4 | 4 | 4 | 4 | 1 | 1  | 3  |
| 41               |  | 41         | 34    | 4                                            | 4 | 4 | 4 | 4 | 4 | 4 | 1 | 1 | 1  | 3  |
| 20               |  | 41         | 29    | 3                                            | 4 | 4 | 2 | 1 | 4 | 4 | 2 | 1 | 1  | 3  |
| 16               |  | 41         | 30    | 3                                            | 4 | 3 | 3 | 2 | 4 | 1 | 4 | 1 | 2  | 3  |
| 30               |  | 41         | 24    | 3                                            | 2 | 3 | 2 | 1 | 4 | 4 | 1 | 1 | 1  | 2  |
| Mean             |  |            | 29,6  |                                              |   |   |   |   |   |   |   |   |    |    |
| Meta-Analysis    |  |            |       |                                              |   |   |   |   |   |   |   |   |    |    |
| 43               |  | 44         | 26    | 2                                            | 4 | 4 | 2 | 2 | 2 | 2 | 2 | 3 | 1  | 2  |
| 32               |  | 44         | 37    | 4                                            | 4 | 4 | 2 | 4 | 4 | 3 | 4 | 4 | 1  | 3  |
| 23               |  | 44         | 37    | 3                                            | 4 | 4 | 2 | 4 | 4 | 4 | 3 | 4 | 2  | 3  |
| 38               |  | 44         | 26    | 3                                            | 2 | 4 | 1 | 1 | 4 | 3 | 3 | 1 | 1  | 3  |
| 40               |  | 44         | 28    | 3                                            | 1 | 4 | 2 | 2 | 4 | 4 | 4 | 1 | 2  | 1  |
| 24               |  | 44         | 21    | 3                                            | 1 | 3 | 3 | 1 | 4 | 1 | 1 | 1 | 1  | 2  |
| 35               |  | 44         | 38    | 4                                            | 4 | 4 | 3 | 2 | 4 | 4 | 4 | 4 | 2  | 3  |
| 48               |  | 44         | 38    | 4                                            | 4 | 4 | 2 | 2 | 4 | 4 | 4 | 4 | 3  | 3  |
| 45               |  | 44         | 43    | 4                                            | 4 | 4 | 4 | 4 | 4 | 4 | 4 | 4 | 4  | 3  |
| 33               |  | 44         | 37    | 4                                            | 4 | 4 | 3 | 4 | 4 | 4 | 2 | 4 | 1  | 3  |
| 25               |  | 44         | 34    | 4                                            | 4 | 3 | 2 | 2 | 4 | 4 | 2 | 4 | 2  | 3  |
| 22               |  | 44         | 32    | 4                                            | 4 | 4 | 1 | 4 | 4 | 4 | 2 | 1 | 1  | 3  |
| 37               |  | 44         | 36    | 4                                            | 2 | 4 | 4 | 4 | 4 | 4 | 2 | 4 | 1  | 3  |

|                                |  |    |           |     |     |     |     |     |     |     |     |                  |     |     |
|--------------------------------|--|----|-----------|-----|-----|-----|-----|-----|-----|-----|-----|------------------|-----|-----|
| <sup>47</sup>                  |  | 44 | 26        | 3   | 1   | 3   | 3   | 2   | 4   | 3   | 2   | 1                | 1   | 3   |
| <sup>17</sup>                  |  | 44 | 38        | 4   | 4   | 3   | 3   | 2   | 4   | 4   | 3   | 4                | 4   | 3   |
| <sup>18</sup>                  |  | 44 | 40        | 4   | 4   | 4   | 4   | 4   | 4   | 4   | 4   | 4                | 1   | 3   |
| <sup>26</sup>                  |  | 44 | 28        | 3   | 1   | 3   | 2   | 2   | 4   | 4   | 4   | 1                | 1   | 3   |
| <sup>34</sup>                  |  | 44 | 29        | 3   | 2   | 4   | 1   | 2   | 4   | 4   | 4   | 2                | 1   | 2   |
| <sup>36</sup>                  |  | 44 | 32        | 3   | 2   | 2   | 2   | 2   | 4   | 4   | 3   | 4                | 3   | 3   |
| <b>Mean</b>                    |  |    | <b>33</b> | 3,4 | 3,2 | 3,6 | 2,5 | 2,5 | 3,9 | 3,3 | 2,9 | 2,9 <sup>1</sup> | 1,4 | 2,7 |
| <b>Reviews with 4/4 points</b> |  |    |           | 15  | 24  | 25  | 7   | 14  | 35  | 25  | 15  | 11 <sup>1</sup>  | 2   | 0   |

6

7

1: # of included papers = 19

## 8 Additional file 7 - Characteristics of included systematic reviews

9

| Ref           | Year | Intervention and Condition/ Setting                                                                                                                                                           | Included Studies |                 |                               | Meta-analysis | Primary Endpoint                                                                                                          |
|---------------|------|-----------------------------------------------------------------------------------------------------------------------------------------------------------------------------------------------|------------------|-----------------|-------------------------------|---------------|---------------------------------------------------------------------------------------------------------------------------|
|               |      |                                                                                                                                                                                               | $\Sigma$         | Con-trolled (%) | Inpatient/ Intersec-toral (%) |               |                                                                                                                           |
|               |      | <b>structure- and process-related quality-interventions</b>                                                                                                                                   |                  |                 |                               |               |                                                                                                                           |
| <sup>16</sup> | 2006 | clinical pharmacists for hospitalized adults                                                                                                                                                  | 36               | 66              | 100                           | no            | adverse drug events, medication appropriateness, resource use                                                             |
| <sup>17</sup> | 2013 | Comprehensive geriatric assessment for adults $\geq 60y$                                                                                                                                      | 12               | 100             | 100                           | yes           | functional status, readmission rate, mortality or length of stay                                                          |
| <sup>20</sup> | 2011 | hospital-wide interventions for older patients: 'integrated practices throughout the hospital system of care delivery for older patients, unrestricted to medical departments or specialties' | 20               | 100             | 100                           | no            | functional performance, length of stay, mortality, discharge destination, readmission, complications, resource use, costs |
| <sup>18</sup> | 2013 | Organized stroke unit care                                                                                                                                                                    | 28               | 100             | 100                           | yes           | death, dependency, institutional care                                                                                     |
| <sup>19</sup> | 2009 | quality indicators in hospital care                                                                                                                                                           | 21               | 100             | 100                           | no            | improving quality of hospital care                                                                                        |
|               |      | <b>structure-related quality-interventions</b>                                                                                                                                                |                  |                 |                               |               |                                                                                                                           |
| <sup>21</sup> | 2013 | personal digital assistants (PDAs) in clinical settings                                                                                                                                       | 7                | 100             | 71                            | no            | usefulness of PDAs                                                                                                        |
| <sup>24</sup> | 2005 | mobile stroke teams vs. 1) General medicine ward; 2) Comprehensive stroke unit                                                                                                                | 6                | 100             | 100                           | yes           | Death, institutional care, dependency                                                                                     |
| <sup>25</sup> | 2013 | stroke unit                                                                                                                                                                                   | 8                | 100             | 100                           | yes           | Death, dependence, combined outcomes institutionalization;                                                                |
| <sup>22</sup> | 2005 | Clinical decision support systems in neonatal care                                                                                                                                            | 2                | 100             | 100                           | yes           | Mortality ( $\leq 28$ days, $\leq 1y$ of life); physician/ nursing staff performance                                      |
| <sup>26</sup> | 2010 | Geriatric Evaluation and Management Units for elderly people                                                                                                                                  | 7                | 100             | 100                           | yes           | mortality, institutionalization, functional decline, readmission, length of stay                                          |

|    |                                              |                                                                                                        |    |     |     |     |                                                                                                                                                                                            |
|----|----------------------------------------------|--------------------------------------------------------------------------------------------------------|----|-----|-----|-----|--------------------------------------------------------------------------------------------------------------------------------------------------------------------------------------------|
| 23 | 2013                                         | Computerized advice on drug dosage to improve prescribing practice of healthcare professionals         | 42 | 95  | 71  | yes | patient-oriented outcomes                                                                                                                                                                  |
|    | <b>Process-related quality-interventions</b> |                                                                                                        |    |     |     |     |                                                                                                                                                                                            |
|    | <u>Pathw ays</u>                             |                                                                                                        |    |     |     |     |                                                                                                                                                                                            |
| 43 | 2011                                         | colorectal surgery patients in recovery                                                                | 6  | 100 | 100 | yes | morbidity, effectiveness of care                                                                                                                                                           |
| 42 | 2016                                         | dying patients, carers/ providers/ relatives                                                           | 1  | 100 | 100 | no  | Physical/ Psychological symptom severity; Quality of life; Harms                                                                                                                           |
| 45 | 2010                                         | stand-alone- and multi-faceted- pathw ays in different settings/ conditions                            | 27 | 92  | 77  | yes | Professional practice, patient outcomes, length of stay, hospital costs                                                                                                                    |
| 44 | 2012                                         | Pathw ays for hip fracture                                                                             | 15 | 80  | 100 | no  | clinical parameters, process of care, and/or hospitalization costs                                                                                                                         |
|    | <u>Interprofessional Approaches</u>          |                                                                                                        |    |     |     |     |                                                                                                                                                                                            |
| 38 | 2011                                         | comprehensive geriatric assessment for older adults admitted as emergency                              | 22 | 100 | 100 | yes | living at home                                                                                                                                                                             |
| 41 | 2009                                         | interprofessional collaboration of practice-based interventions in <b>unspecified conditions</b>       | 5  | 100 | 100 | no  | patient/ client health measures; healthcare process; patient/family satisfaction                                                                                                           |
| 39 | 2016                                         | Multifaceted Care for ICU-patients                                                                     | 14 | 100 | 100 | no  | Patient-centered clinical outcomes; care process adoption success; costsavings.                                                                                                            |
| 40 | 2014                                         | team-based models of care for patients w ith an illness that w ill w orsen and eventually cause death. | 12 | 83  | 66  | yes | quality of life; symptom management; patient-/caregiver-/provider- satisfaction; emergency department visits; length of stay; hospital- or intensive care unit-ad-missions; place of death |
|    | <u>Discharge Planning</u>                    |                                                                                                        |    |     |     |     |                                                                                                                                                                                            |
| 36 | 2004                                         | Comprehensive Discharge Plan, Post-Discharge Support for pa-tients w ith Congestive Heart Failure      | 18 | 100 | 100 | yes | proportion of patients readmitted at least once                                                                                                                                            |

|    |                                    |                                                                                                                                                                                |    |     |     |     |                                                                                                                                                                                                                                                                                                              |
|----|------------------------------------|--------------------------------------------------------------------------------------------------------------------------------------------------------------------------------|----|-----|-----|-----|--------------------------------------------------------------------------------------------------------------------------------------------------------------------------------------------------------------------------------------------------------------------------------------------------------------|
| 32 | 2002                               | early discharge of healthy mothers and term infants                                                                                                                            | 10 | 100 | 100 | yes | <b>Infants:</b> readmitted for neonatal morbidity $\leq 7$ , $\leq 28$ d after birth; <b>women:</b> readmitted for birth-complications $\leq 6$ w k after birth, above the cut-off score for measuring depression at 6-8w k, 3mo. and 6 mo. after birth, breastfeeding at 6w k, 12w k and 6 mo. after birth. |
| 29 | 2011                               | computer-enabled discharge communication for patients after discharge from acute care hospitals                                                                                | 12 | 75  | 100 | no  | mortality, readmission/ED visits, adverse events                                                                                                                                                                                                                                                             |
| 35 | 2015                               | ED community transition strategies (ED-CTS) for people $\geq 65$ y after emergency department discharge                                                                        | 9  | 55  | 100 | yes | unplanned ED re-attendance, emergency hospitalization and mortality                                                                                                                                                                                                                                          |
| 30 | 2013                               | Transitional Care Interventions of <b>unspecified conditions</b>                                                                                                               | 47 | 100 | 100 | no  | adverse events, emergency department visits, readmissions after discharge                                                                                                                                                                                                                                    |
| 27 | 2015                               | Family-Centered Transition: Hospital to Home for pediatric, adult, elderly patients                                                                                            | 16 | 81  | 100 | no  | Patient health outcomes and health care utilization.                                                                                                                                                                                                                                                         |
| 34 | 2000                               | supporting discharge for people $>65$ y                                                                                                                                        | 9  | 100 | 100 | yes | -                                                                                                                                                                                                                                                                                                            |
| 28 | 2012                               | improve patient discharge from hospital to primary care                                                                                                                        | 36 | 100 | 100 | no  | overall effects of these interventions                                                                                                                                                                                                                                                                       |
| 33 | 2016                               | discharge planning for Hospital-patients                                                                                                                                       | 30 | 100 | 100 | yes | Length of stay in hospital; Readmission rate to hospital                                                                                                                                                                                                                                                     |
| 31 | 2012                               | early patient engagement, patient-caregiver dyad intervention, transitional care, coordinated care, multidisciplinary team approach for Community acquired pneumonia- patients | 3  | 100 | 100 | no  | hospital readmission, emergency room visit (not measured), and unscheduled visit (not measured)                                                                                                                                                                                                              |
| 37 | 2012                               | Services to reduce duration inpatient-care after acute stroke                                                                                                                  | 14 | 100 | 100 | yes | composite end-point of death or long-term dependency                                                                                                                                                                                                                                                         |
|    | <u>Other Process-Interventions</u> |                                                                                                                                                                                |    |     |     |     |                                                                                                                                                                                                                                                                                                              |
| 48 | 2016                               | Communication tools for end-of-life decision-making for intensive care unit (ICU)-patients                                                                                     | 19 | 89  | 100 | yes | patients with: documented goals of care discussions + code status; new decisions to withdraw/withhold life-sustaining treatments                                                                                                                                                                             |
| 47 | 2008                               | hospital fall prevention programs of <b>not specified conditions</b>                                                                                                           | 8  | 100 | 100 | yes | number of falls or fallers                                                                                                                                                                                                                                                                                   |
| 46 | 2015                               | Interventions to reduce medication errors for inpatient-children                                                                                                               | 7  | 71  | 100 | no  | Medical Errors and related harm                                                                                                                                                                                                                                                                              |

|               |      |                                                                                                                   |    |     |     |    |                                                                          |
|---------------|------|-------------------------------------------------------------------------------------------------------------------|----|-----|-----|----|--------------------------------------------------------------------------|
| <sup>52</sup> | 2009 | interventions to promote adoption of information and communication technologies Healthcare professionals behavior | 10 | 90  | 60  | no | effectiveness of interventions to promote the adoption of ICT            |
| <sup>49</sup> | 2008 | Shared Decision-Making of <b>not specified conditions</b>                                                         | 11 | 100 | 72  | no | treatment adherence, patient satisfaction, well-being, quality of life   |
| <sup>50</sup> | 2009 | routine use of patient-reported data for cancer patients                                                          | 6  | 100 | 100 | no | satisfaction, health status (clinical or self-reported) and resource use |
| <sup>51</sup> | 2013 | Nutritional screening for patients >15y                                                                           | 3  | 100 | 66  | no | mortality, morbidity, health quality of life                             |



10 **Additional file 7 - Aggregation and direction of extracted effects**

| Effect-Description | N   | % <sup>1</sup> | Favors       |                |               |                | no difference |       | unclear |       |
|--------------------|-----|----------------|--------------|----------------|---------------|----------------|---------------|-------|---------|-------|
|                    |     |                | Intervention |                | Standard-care |                |               |       |         |       |
|                    |     |                | n            | % <sup>2</sup> | n             | % <sup>2</sup> | n             | %     | n       | %     |
| Mortality          | 28  | 14,4%          | 20           | 71,4%          | 6             | 21,4%          | 2             | 7,1%  | 0       | 0,0%  |
| Adverse Event      | 32  | 16,5%          | 18           | 56,3%          | 4             | 12,5%          | 0             | 0,0%  | 10      | 31,3% |
| Patient-reported   | 25  | 12,9%          | 18           | 72,0%          | 1             | 4,0%           | 2             | 8,0%  | 4       | 16,0% |
| Physician-reported | 28  | 14,4%          | 19           | 67,9%          | 3             | 10,7%          | 2             | 7,1%  | 4       | 14,3% |
| Health economical  | 13  | 6,7%           | 7            | 53,8%          | 0             | 0,0%           | 1             | 7,7%  | 5       | 38,5% |
| Treatment Duration | 13  | 6,7%           | 8            | 61,5%          | 0             | 0,0%           | 1             | 7,7%  | 4       | 30,8% |
| Combined endpoint  | 17  | 8,8%           | 14           | 82,4%          | 3             | 17,6%          | 0             | 0,0%  | 0       | 0,0%  |
| Readmissions       | 18  | 9,3%           | 13           | 72,2%          | 1             | 5,6%           | 2             | 11,1% | 2       | 11,1% |
| Other              | 20  | 10,3%          | 15           | 75,0%          | 1             | 5,0%           | 0             | 0,0%  | 4       | 20,0% |
| Σ                  | 194 | 100%           | 132          | 68,0%          | 19            | 9,8%           | 10            | 5,2%  | 33      | 17,0% |

11 1: N = 194

12 2: N = Sum of each content
